# Supplementary material
Source: MDPI journal article supplement (https://www.mdpi.com/2072-4292/9/11/1189)
Supplement: s1 [file s1]

## Supplementary Materials

# Photochemical reflectance index (PRI) for detecting responses of diurnal and seasonal photosynthetic activity to experimental drought and warming in a Mediterranean shrubland

Chao Zhang <sup>1,2,\*</sup>, Iolanda Filella <sup>1,2</sup>, Daijun Liu <sup>1,2</sup>, Romà Ogaya <sup>1,2</sup>, Joan Llusia<sup>1,2</sup>, Dolores Asensio <sup>1,2</sup>, Josep Peñuelas <sup>1,2</sup>

<sup>1</sup> CREAM, Cerdanyola del Vallès 08193, Catalonia, Spain; iola@creaf.uab.cat (I.F.); d.liu@creaf.uab.cat (D.L.); r.ogaya@creaf.uab.cat (R.O.); j.llusia@creaf.uab.cat (J.L.); loles@creaf.uab.cat (D.A.); josep.penuelas@uab.cat (J.P.)

<sup>2</sup> CSIC, Global Ecology Unit CREAM-CSIC-UAB, Bellaterra 08193, Catalonia, Spain

\* Correspondence: c.zhang@creaf.uab.cat; Tel.: +34-935813355

## Figure legends

**Figure S1.** Seasonal variation of the normalized difference chlorophyll index (NDCI) (**a**) and the structure-independent pigment index (SIPI) (**b**) for *Erica multiflora* in 2014.

**Figure S2.** Relationships of CO<sub>2</sub> assimilation rate (*A*) with water content (WC) (**a**) and the water index (WI) (**b**) for *Erica multiflora* in 2014.

**Figure S3.** Relationships of CO<sub>2</sub> assimilation rate (*A*) with maximum ( $F_v/F_m$ ) (**a**) and actual (Yield) (**b**) photochemical efficiency of PSII for *Erica multiflora* in 2014.

**Figure S4.** Relationships of CO<sub>2</sub> assimilation rate (*A*) with the normalized difference chlorophyll index (NDCI) (**a**) and the structure-independent pigment index (SIPI) (**b**) for *Erica multiflora* in 2014.

**Figure S5.** Relationships of the normalized difference chlorophyll index (NDCI) (**a**) and the structure-independent pigment index (SIPI) (**b**) with the photochemical reflectance index (PRI) for *Erica multiflora* in 2014.

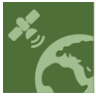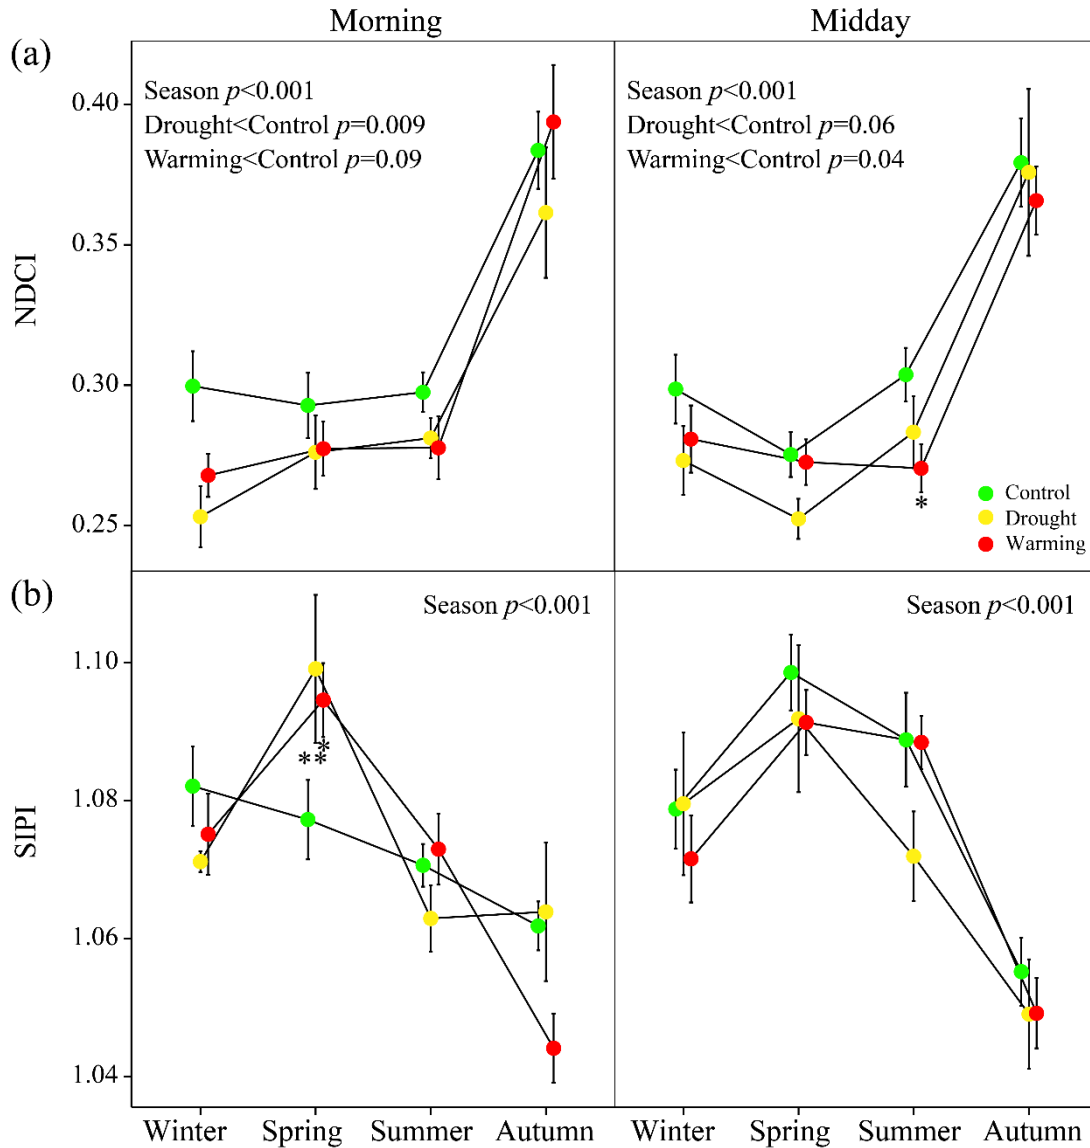

28  
 29  
 30  
 31  
 32  
 33  
 34

**Figure S1.** Seasonal variation of the normalized difference chlorophyll index (NDCI) (a) and the structure-independent pigment index (SIPI) (b) for *Erica multiflora* in 2014. Error bars are standard errors of the mean (n=9 for the drought and warming treatments, and n=18 for the control treatment). The significances of overall repeated-measures ANOVAs are depicted. \* $p < 0.05$  and \*\* $p < 0.01$  between treatments for each seasonal measurement.

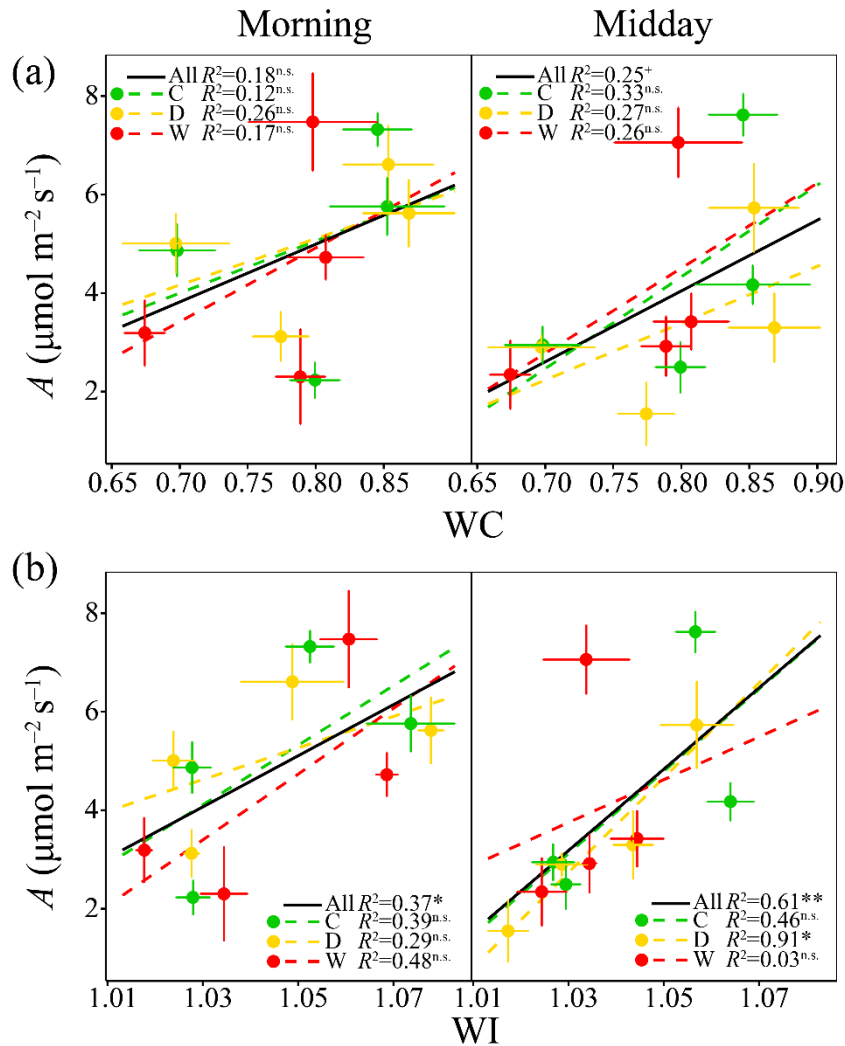

35  
 36 **Figure S2.** Relationships of CO<sub>2</sub> assimilation rate (A) with water content (WC) (a) and the  
 37 water index (WI) (b) for *Erica multiflora* in 2014. The black lines represent the linear  
 38 relationships over all three treatments. n.s.  $p > 0.1$ ,  $^+p < 0.1$ ,  $^*p < 0.05$ ,  $^{**}p < 0.01$  and  $^{***}p < 0.001$   
 39 between variables. C, D and W indicate the control, drought and warming treatments,  
 40 respectively.

41

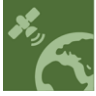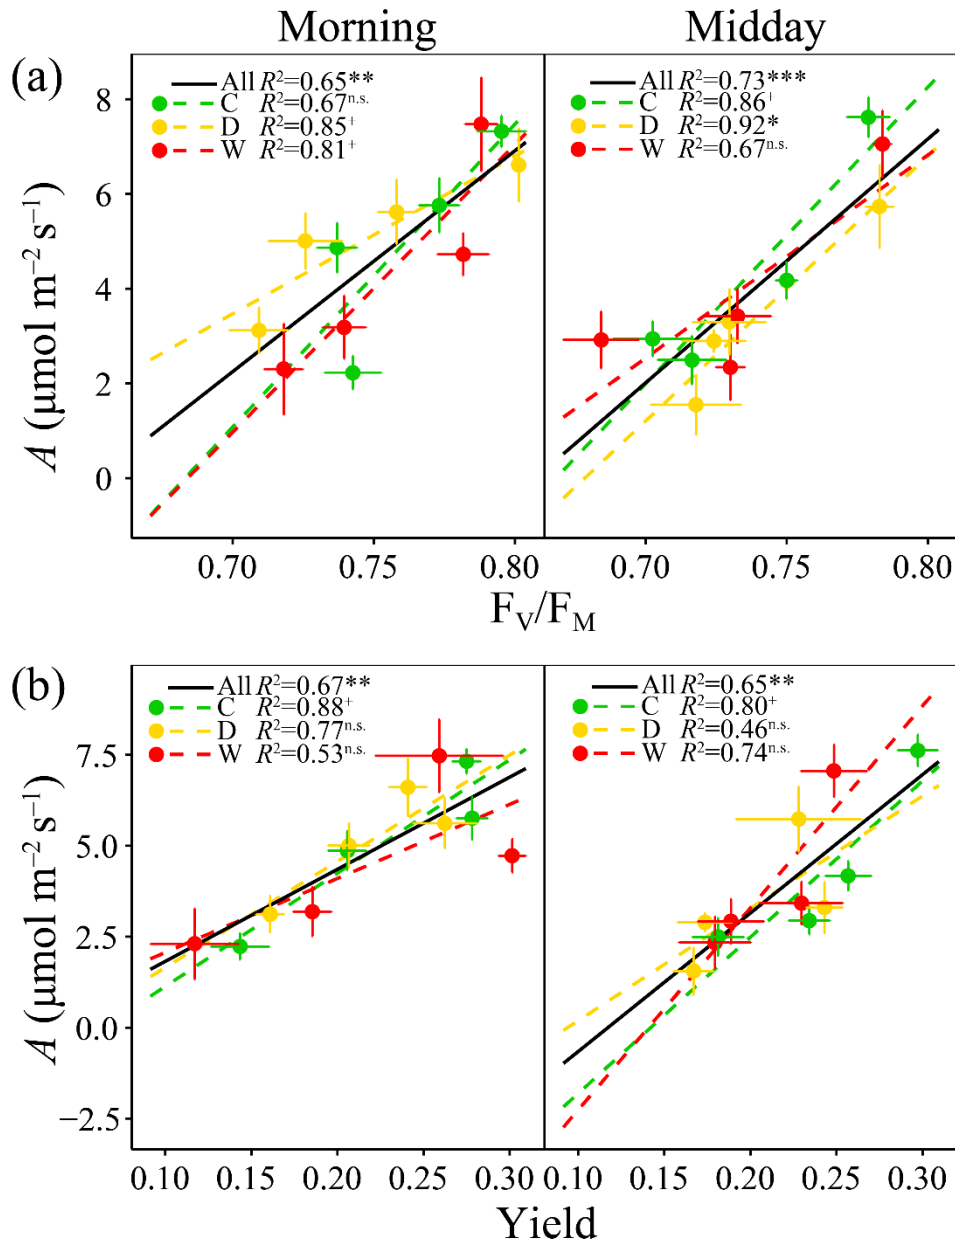

42

43 **Figure S3.** Relationships of CO<sub>2</sub> assimilation rate (*A*) with maximum (*F<sub>v</sub>/F<sub>M</sub>*) (a) and  
 44 actual (Yield) (b) photochemical efficiency of PSII for *Erica multiflora* in 2014. The black  
 45 lines represent the linear relationships over all three treatments. n.s.  $p>0.1$ ,  $^{\dagger}p<0.1$ ,  $^*p<0.05$ ,  
 46  $^{**}p<0.01$  and  $^{***}p<0.001$  between variables. C, D and W indicate the control, drought and  
 47 warming treatments, respectively.

48

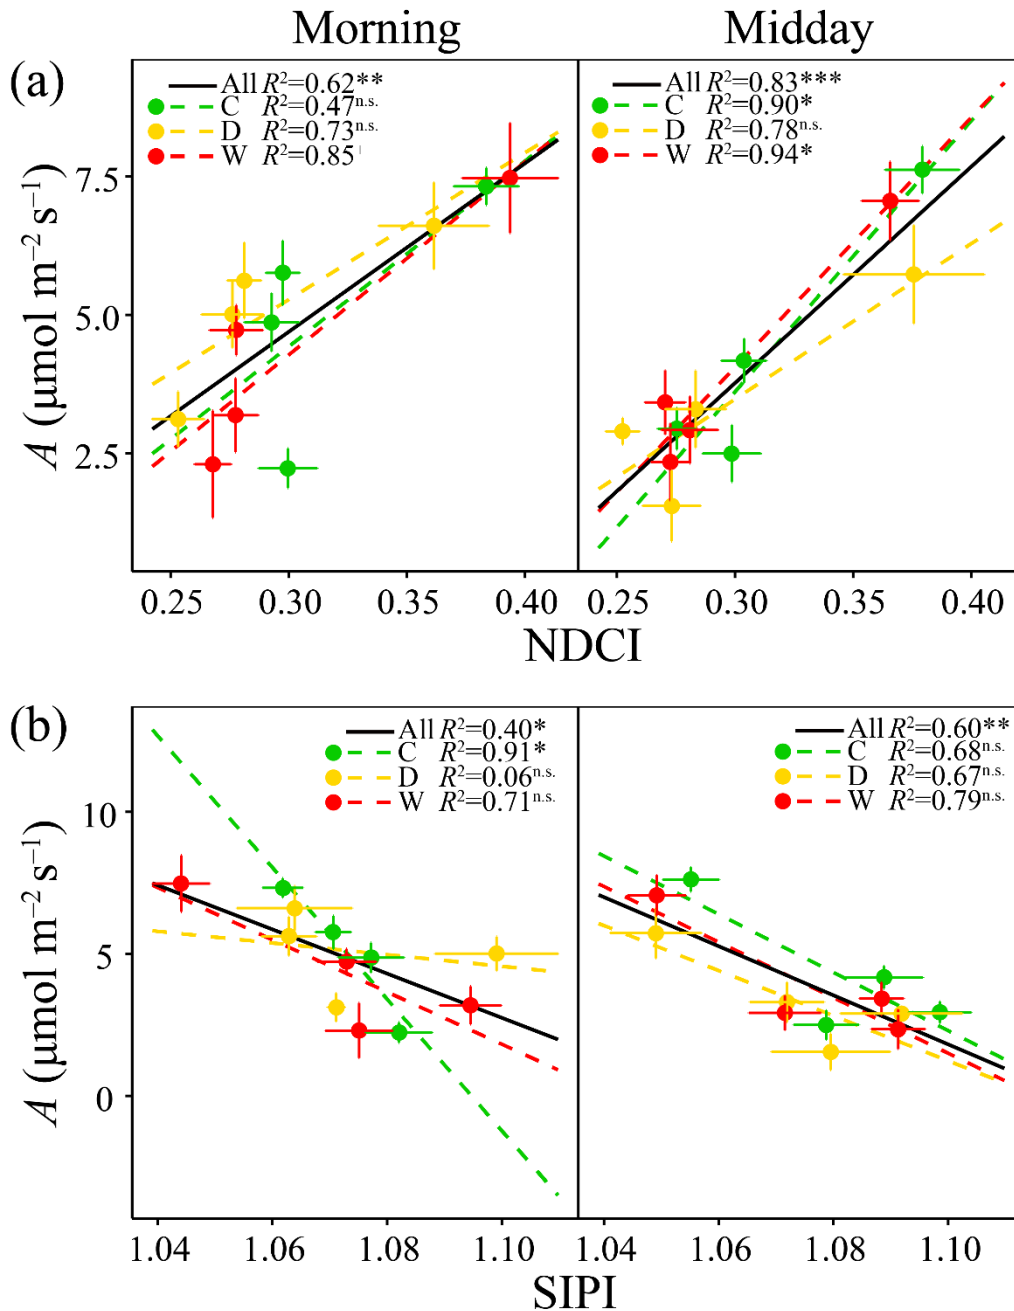

49

50 **Figure S4.** Relationships of CO<sub>2</sub> assimilation rate (A) with the normalized difference  
 51 chlorophyll index (NDCI) (a) and the structure-independent pigment index (SIPI) (b) for  
 52 *Erica multiflora* in 2014. The black lines represent the linear relationships over all three  
 53 treatments. n.s.  $p>0.1$ ,  $^{\dagger}p<0.1$ ,  $^*p<0.05$ ,  $^{**}p<0.01$  and  $^{***}p<0.001$  between variables. C, D and  
 54 W indicate the control, drought and warming treatments, respectively.

55

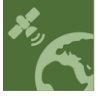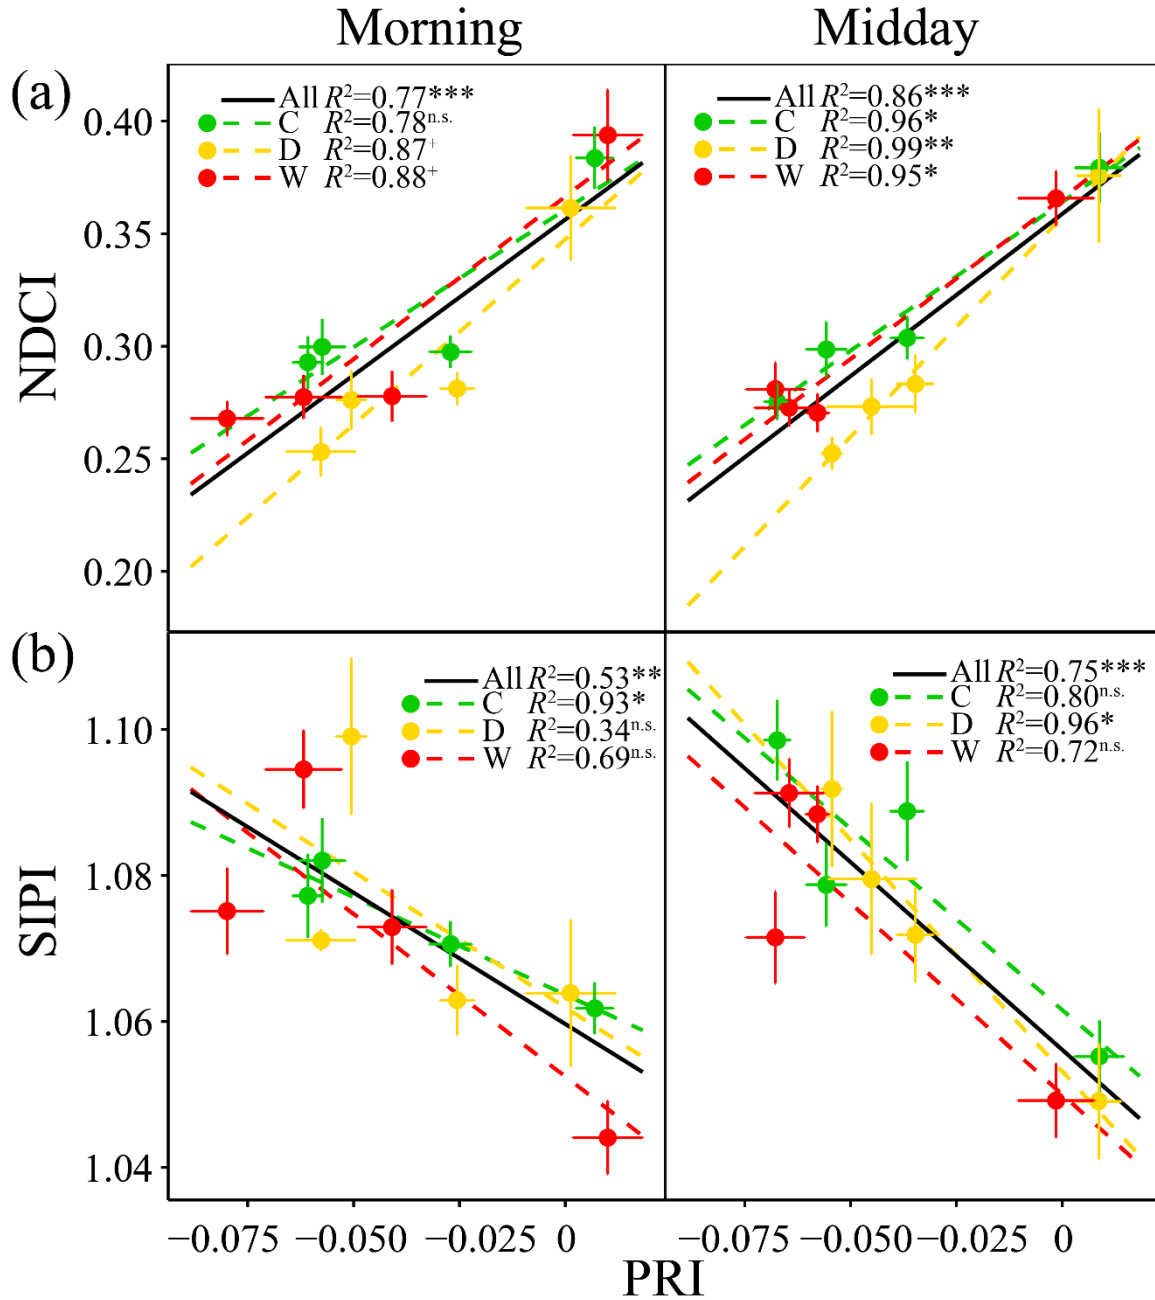

56

57

58

59

60

61

**Figure S5.** Relationships of the normalized difference chlorophyll index (NDCI) (a) and the structure-independent pigment index (SIPI) (b) with the photochemical reflectance index (PRI) for *Erica multiflora* in 2014. The black lines represent the linear relationships over all three treatments. n.s.  $p>0.1$ ,  $^+p<0.1$ ,  $^*p<0.05$ ,  $^{**}p<0.01$  and  $^{***}p<0.001$  between variables. C, D and W indicate the control, drought and warming treatments, respectively.
